# Supplementary material for: miR-29b contributes to multiple types of muscle atrophy
Source: PubMed Central journal article supplement (PMC5458521; doi:10.1038/ncomms15201), 2017-05-25
Supplement: ncomms15201-s1.pdf [file ncomms15201-s1.pdf]

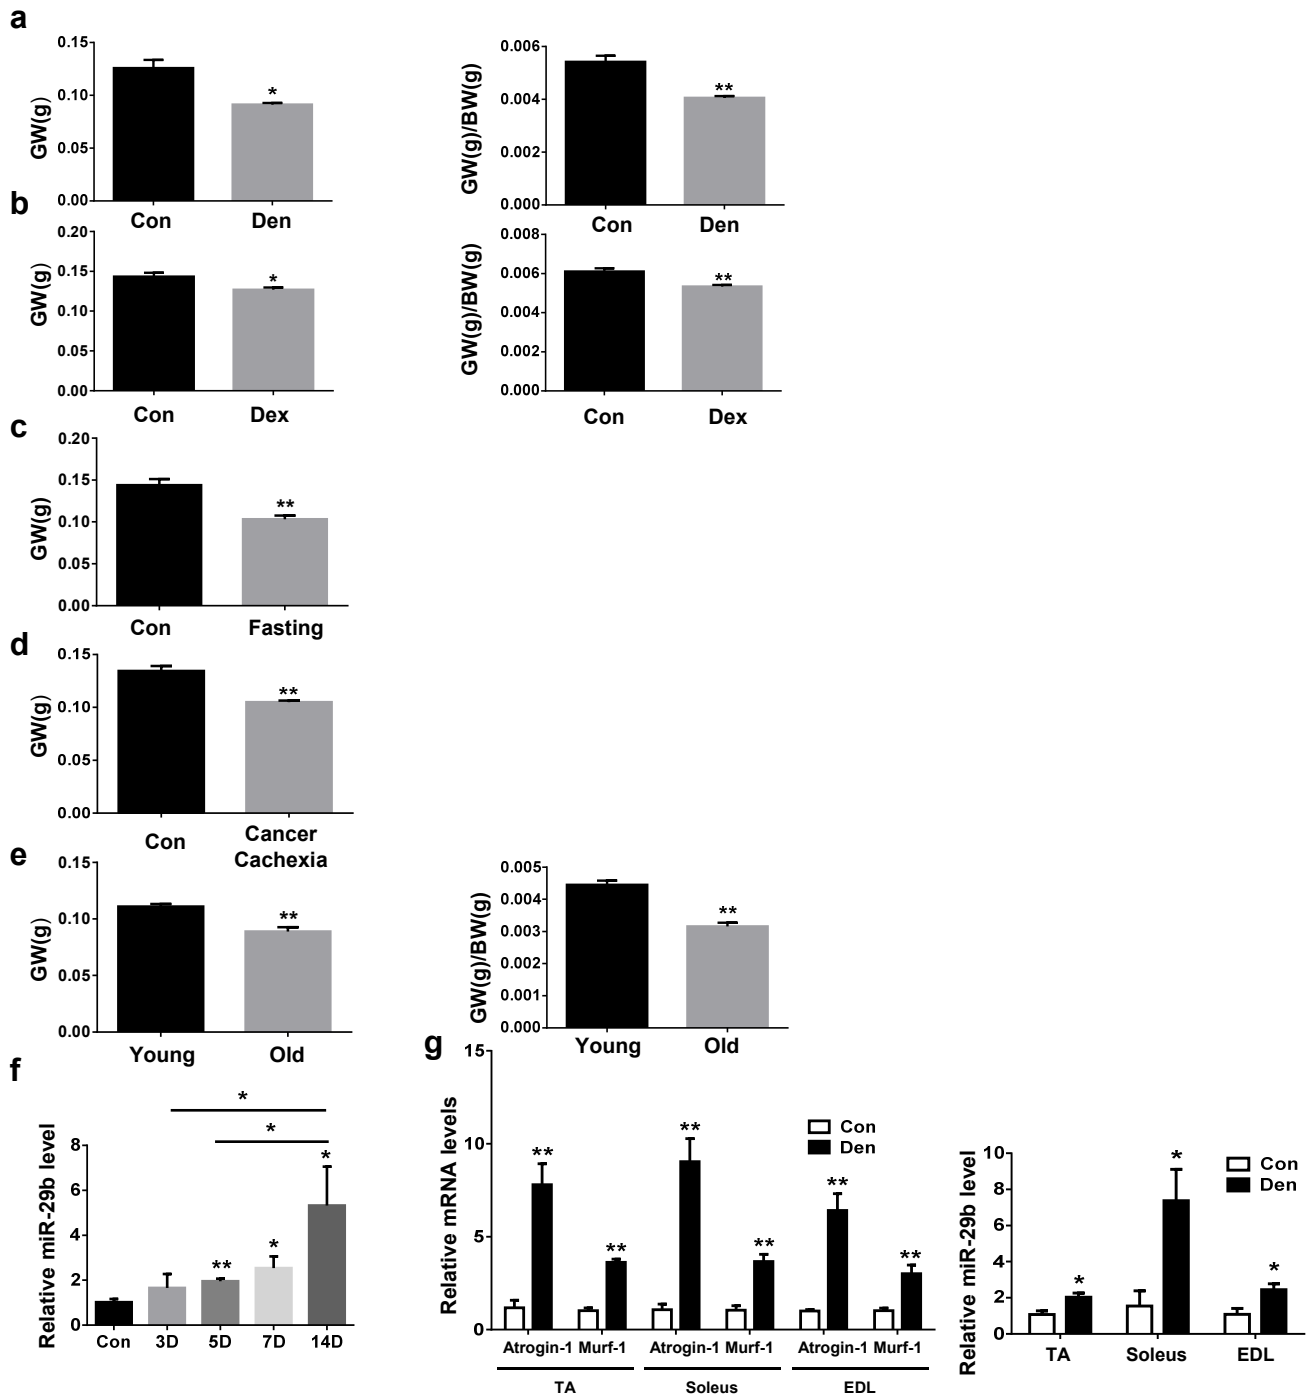

### Supplementary Figure 1. Multiple types of muscle atrophy *in vivo*

(a) Gastrocnemius muscle weight (GW) and gastrocnemius muscle weight/body weight (GW/BW) ratio were reduced in denervation (Den) mice compared to control (Con) group (n=5 per group). (b) GW and GW/BW ratio were reduced in dexamethasone (Dex)-treated mice compared to control group (n=5 per group). (c) GW was reduced in fasting mice compared to control group (n=5 per group). (d) GW was reduced in cancer cachexia mice compared to control group (n=5 per group). (e) GW and GW/BW ratio were reduced in ageing (Old) mice compared to control (Young) mice (n=4 per group). (f) qRT-PCR analysis of miR-29b expression in gastrocnemius muscle from denervation rat at day 3, 5, 7, and 14, compared to controls (n=5 per group). (g) qRT-PCR analysis showed increased *Atrogin-1*, *Murf-1*, and miR-29b expressions in tibialis anterior (TA), soleus, and extensor digitorum longus (EDL) from denervation mice compared to controls (n=5 per group). Error bars, SEM. An unpaired, two-tailed Student's t test was used for comparisons between two groups (a-e, g). One-way ANOVA test was performed to compare multiple groups followed by Bonferroni's post hoc test (f). \*,  $P < 0.05$ . \*\*,  $P < 0.01$ .

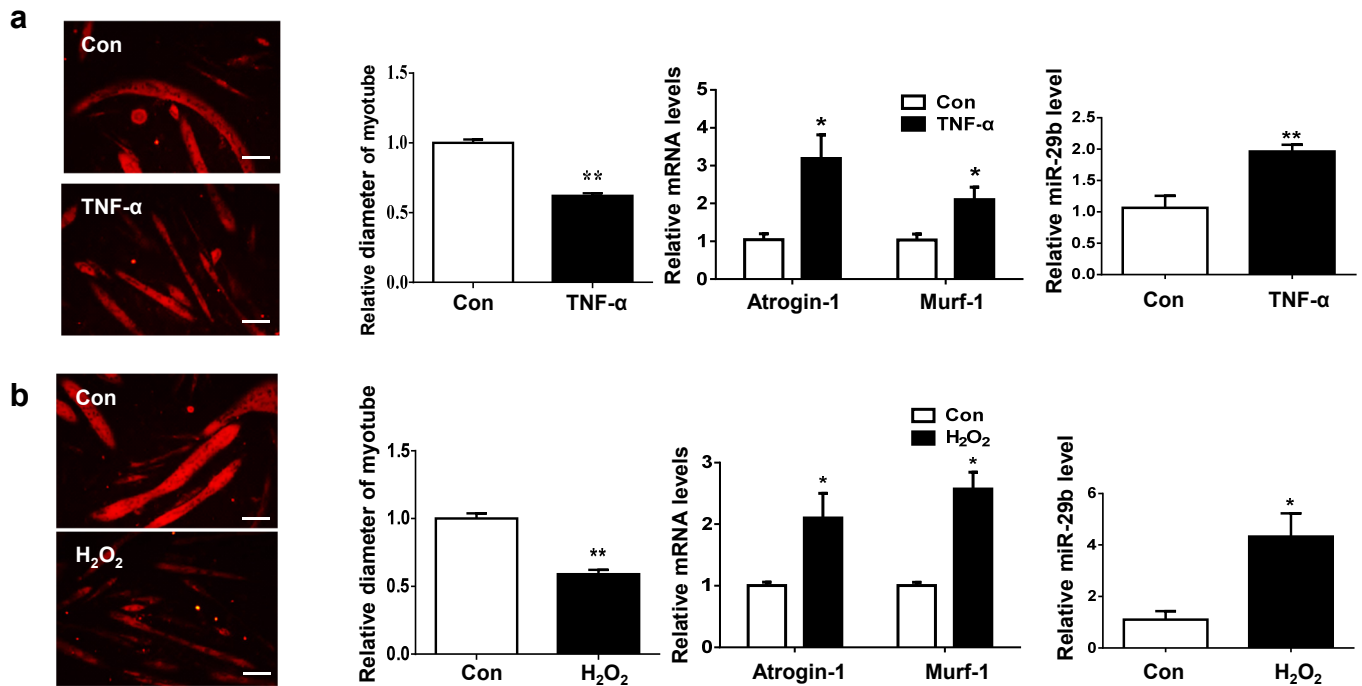

### Supplementary Figure 2. miR-29b is increased in muscle atrophy cell models

**(a)** TNF- $\alpha$  (100 ng/ml) induced muscle atrophy in C2C12 myotubes as evidenced by reduced myotube diameter, accompanied with increased *Atrogin-1*, *Murf-1*, and miR-29b expression levels (n=4 per group, scale bar: 100  $\mu$ m). **(b)** H<sub>2</sub>O<sub>2</sub> (400  $\mu$ M) induced muscle atrophy in C2C12 myotubes as evidenced by reduced myotube diameter, accompanied with increased *Atrogin-1*, *Murf-1*, and miR-29b expression levels (n=4 per group, scale bar: 100  $\mu$ m). Error bars, SEM. An unpaired, two-tailed Student's t test was used for comparisons between two groups. \*,  $P < 0.05$ . \*\*,  $P < 0.01$ .

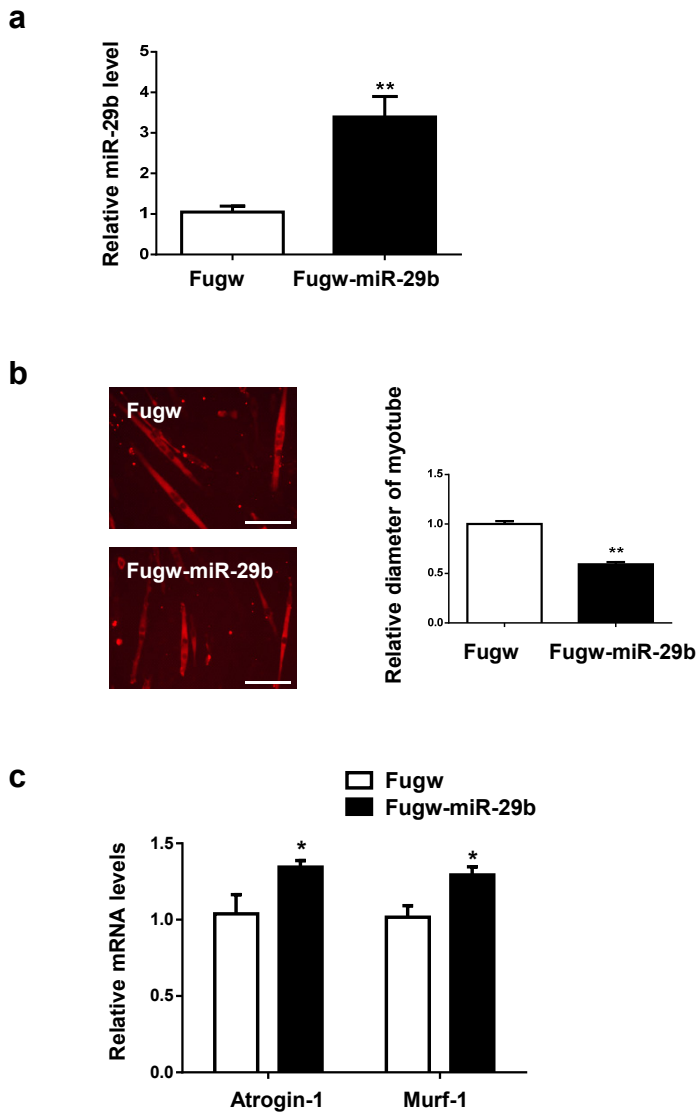

**Supplementary Figure 3. miR-29b is sufficient to induce muscle atrophy *in vitro***

(a) qRT-PCR analysis showed increased miR-29b expression in C2C12 myotubes transfected with Fugw-miR-29b compared to Fugw control (n=6 per group). (b) Immunofluorescent staining for C2C12 myotubes showed reduced myotube diameter when transfected with Fugw-miR-29b (n=4 per group, scale bar: 100  $\mu$ m). (c) qRT-PCR analysis showed up-regulated *Atrogin-1* and *Murf-1* expressions in C2C12 myotubes transfected with Fugw-miR-29b (n=6 per group). Error bars, SEM. An unpaired, two-tailed Student's t test was used for comparisons between two groups. \*,  $P < 0.05$ . \*\*,  $P < 0.01$ .

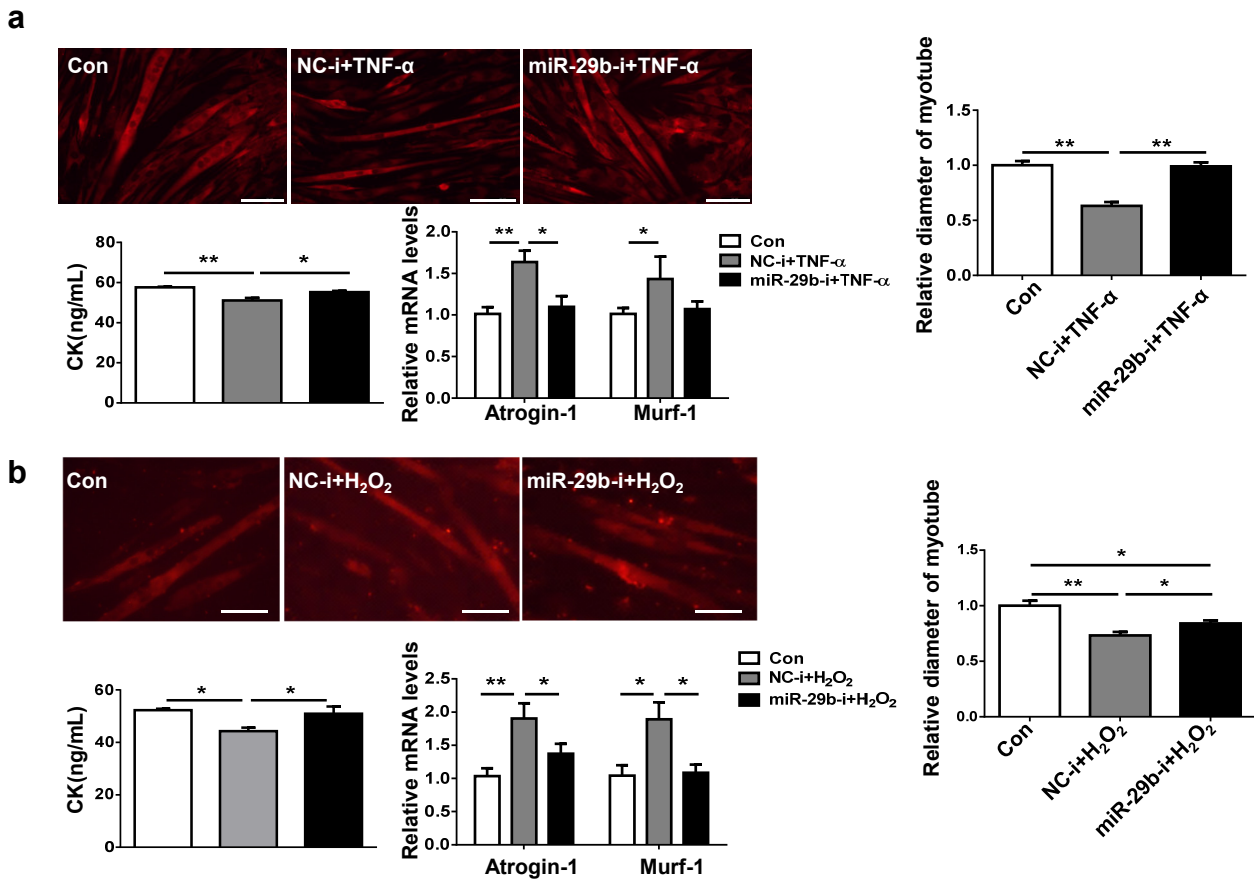

**Supplementary Figure 4. miR-29b is necessary for muscle atrophy *in vitro***

**(a)** miR-29b inhibition attenuated TNF- $\alpha$  (100 ng/ml) induced muscle atrophy in C2C12 myotubes as determined by myotube diameter (n=4 per group, scale bar: 100  $\mu$ m), creatine kinase (CK) activity (n=6 per group), and *Atrogin-1* and *Murf-1* expressions (n=6 per group). **(b)** miR-29b inhibition attenuated H<sub>2</sub>O<sub>2</sub> (400  $\mu$ M) induced muscle atrophy in C2C12 myotubes as determined by myotube diameter (n=4 per group, scale bar: 100  $\mu$ m), creatine kinase (CK) activity (n=6 per group), and *Atrogin-1* and *Murf-1* expressions (n=6 per group). Error bars, SEM. One-way ANOVA test was performed to compare multiple groups followed by Bonferroni's post hoc test. \*,  $P < 0.05$ . \*\*,  $P < 0.01$ .

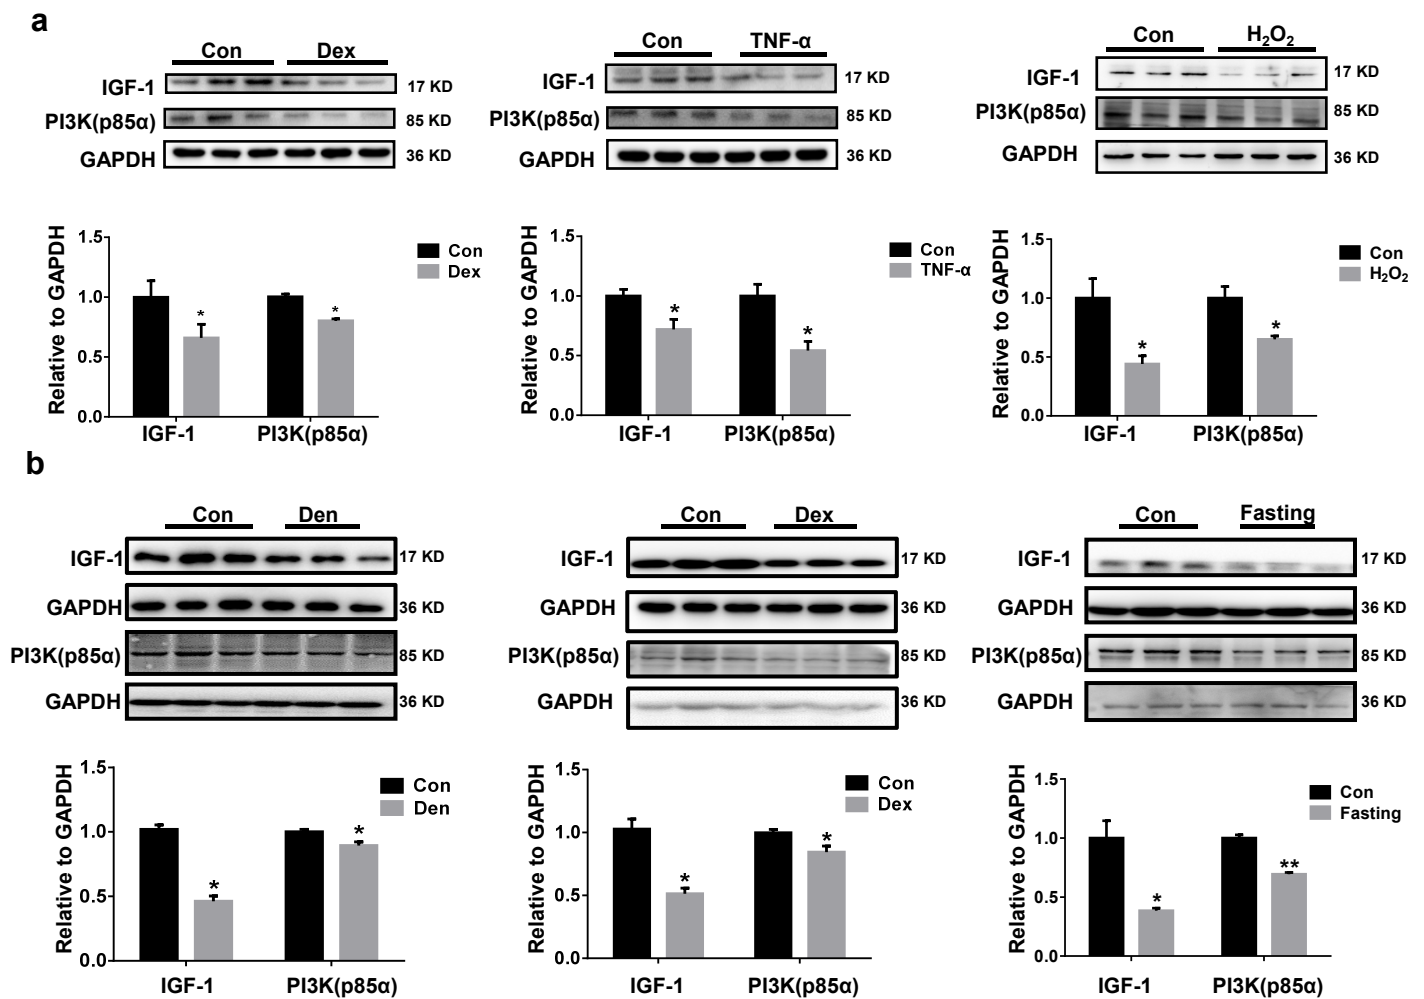

### Supplementary Figure 5. IGF-1 and PI3K(p85α) are reduced in muscle atrophy

(a) Western blot showed that IGF-1 and PI3K(p85α) were down-regulated in dexamethasone (Dex)-, TNF-α-, and H<sub>2</sub>O<sub>2</sub>-induced muscle atrophy *in vitro* (n=3 per group). (b) Western blot showed that IGF-1 and PI3K(p85α) were down-regulated in denervation (Den)-, Dex-, and fasting-induced muscle atrophy *in vivo* (n=3 per group). Error bars, SEM. The presented blots are representative samples of three independent experiments. An unpaired, two-tailed Student's t test was used for comparisons between two groups. \*,  $P < 0.05$ . \*\*,  $P < 0.01$ .

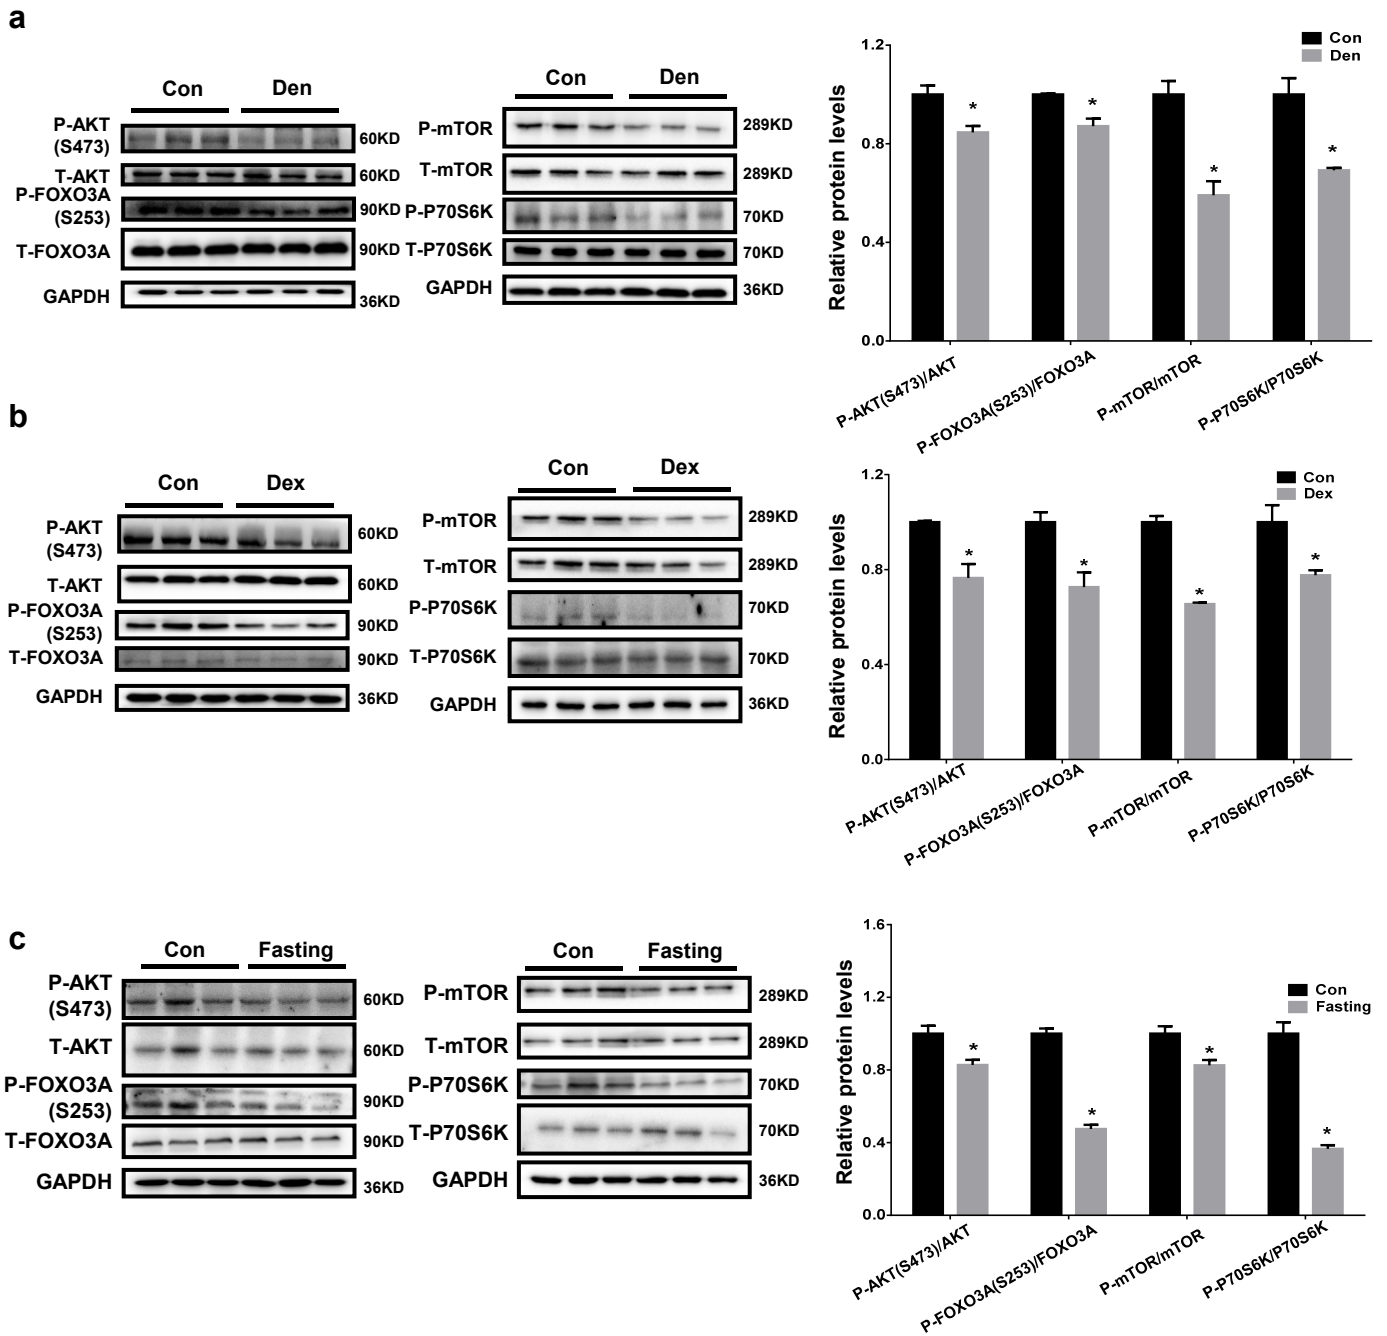

### Supplementary Figure 6. IGF-1-AKT Signaling is decreased in muscle atrophy

(a) Western blot showed that the IGF-1-AKT signaling (AKT, FOXO3A, mTOR, and P70S6K phosphorylation levels) was down-regulated in denervation (Den)-induced muscle atrophy mouse model (n=3 per group). (b) Western blot showed that the IGF-1-AKT signaling was down-regulated in dexamethasone (Dex)-induced muscle atrophy mouse model (n=3 per group). (c) Western blot showed that the IGF-1-AKT signaling was down-regulated in fasting-induced muscle atrophy mouse model (n=3 per group). Error bars, SEM. An unpaired, two-tailed Student's t test was used for comparisons between two groups. \*,  $P < 0.05$ .

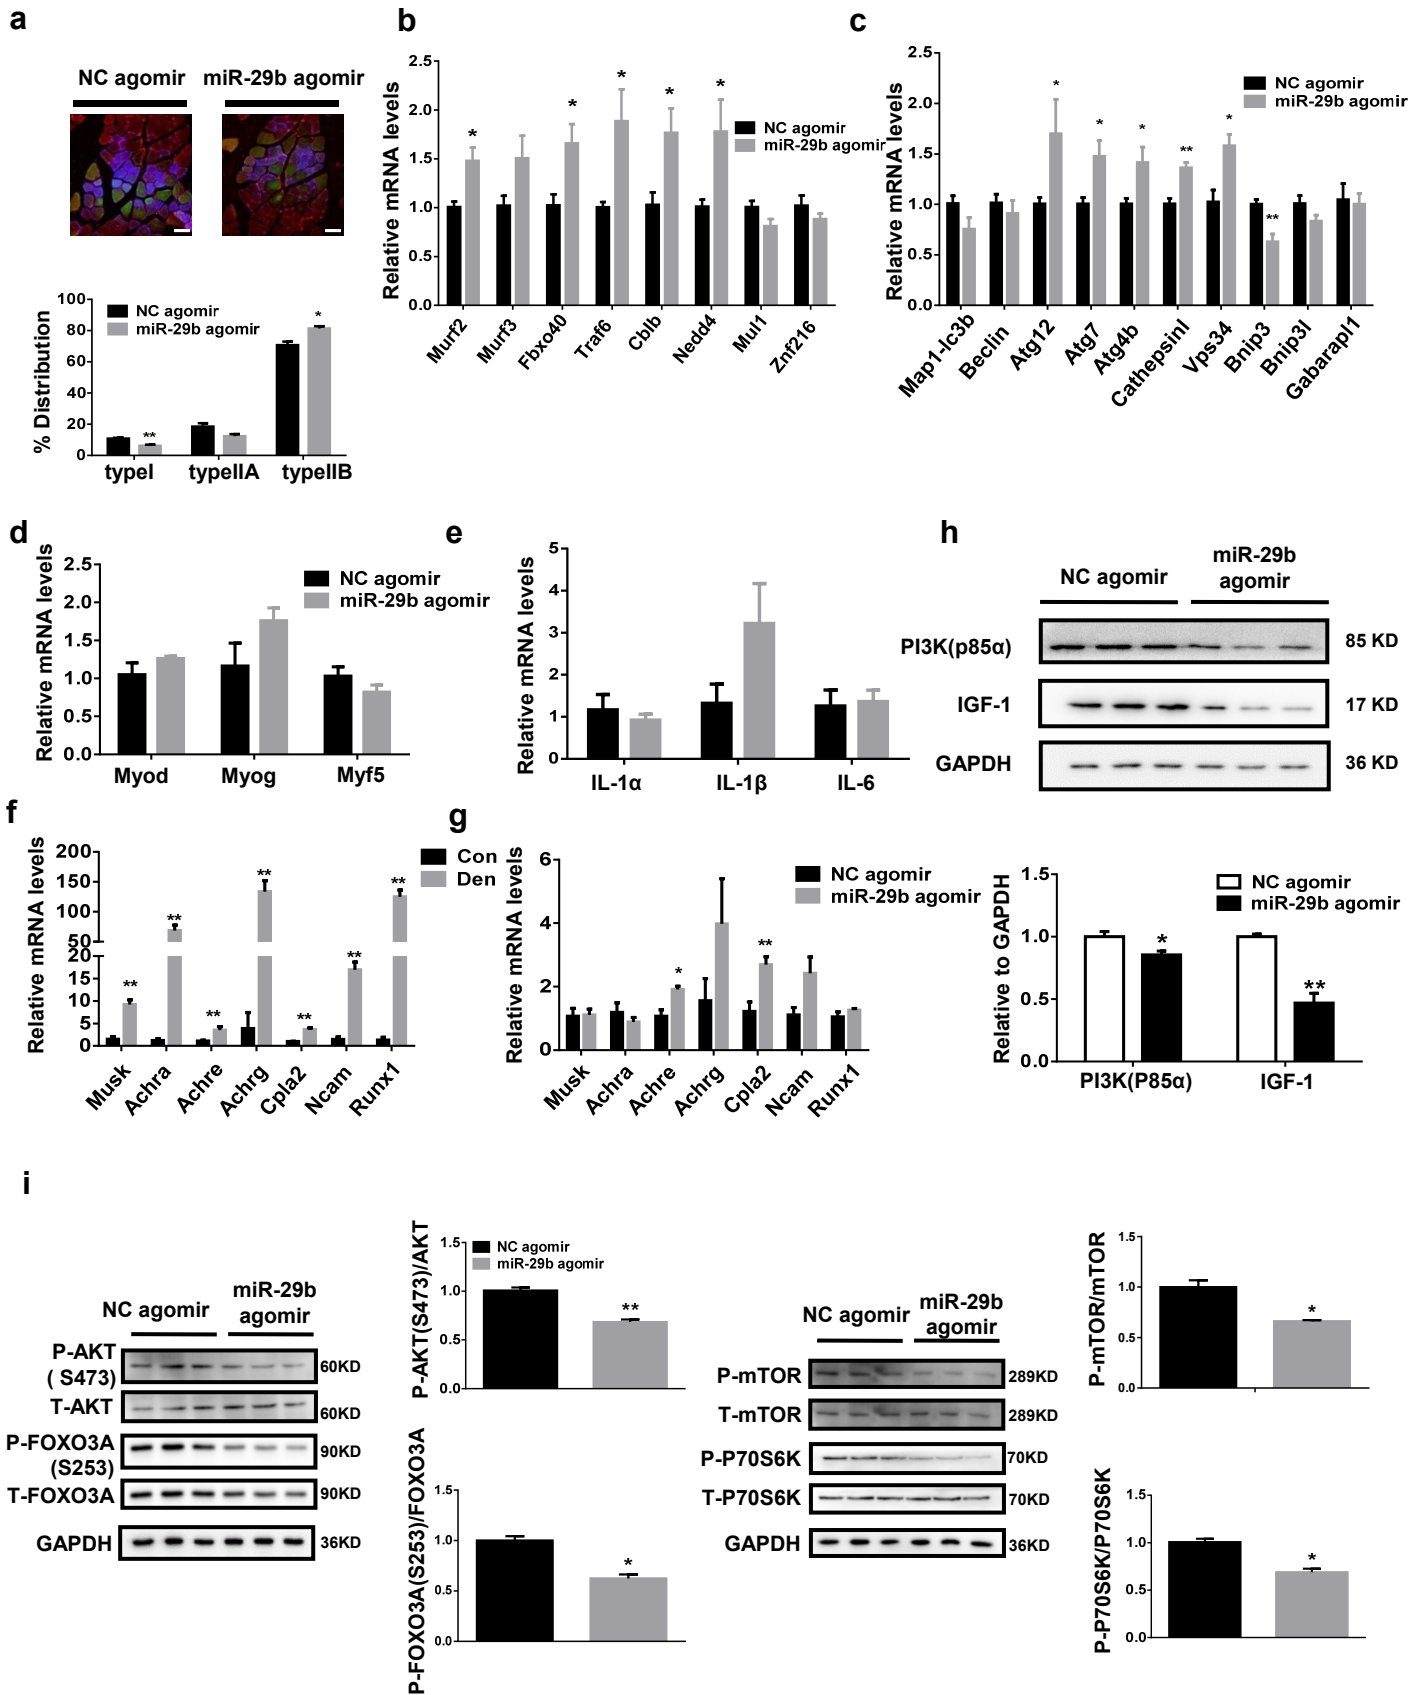

Supplementary Figure 7. miR-29b is sufficient to induce muscle atrophy *in vivo*

(a) Cross sections of gastrocnemius were stained with MHC antibodies to identify type I (blue), type IIA

(green), and type IIB (red) muscle fibers, and to quantify myofiber type distribution in NC agomir and miR-29b agomir treated mice (n=3 per group, scale bar: 50  $\mu$ m). **(b-e)** qRT-PCR analysis of other ubiquitin ligases-related genes **(b)**, autophagy-related genes **(c)**, degeneration/regeneration-related genes **(d)**, and inflammation-related genes **(e)** in the gastrocnemius from mice treated with miR-29b agomir (n=5 per group). **(f)** qRT-PCR analysis showed up-regulated transcriptional markers of denervation (*Musk*, *Achra*, *Achre*, *Achrg*, *Cpla2*, *Ncam*, and *Runx1*) in the gastrocnemius from denervated (Den) mice compared to controls (n=5 per group). **(g)** qRT-PCR analysis showed up-regulated transcriptional markers of denervation (*Achre* and *Cpla2*) in the gastrocnemius from mice treated with miR-29b agomir (n=5 per group). **(h)** Western blot showed that IGF-1 and PI3K(p85 $\alpha$ ) were down-regulated in miR-29b agomir treated mice (n=3 per group). **(i)** Western blot showed that the IGF-1-AKT signaling (AKT, FOXO3A, mTOR, and P70S6K phosphorylation levels) was down-regulated in miR-29b agomir treated mice (n=3 per group). Error bars, SEM. An unpaired, two-tailed Student's t test was used for comparisons between two groups. \*,  $P < 0.05$ . \*\*,  $P < 0.01$ .



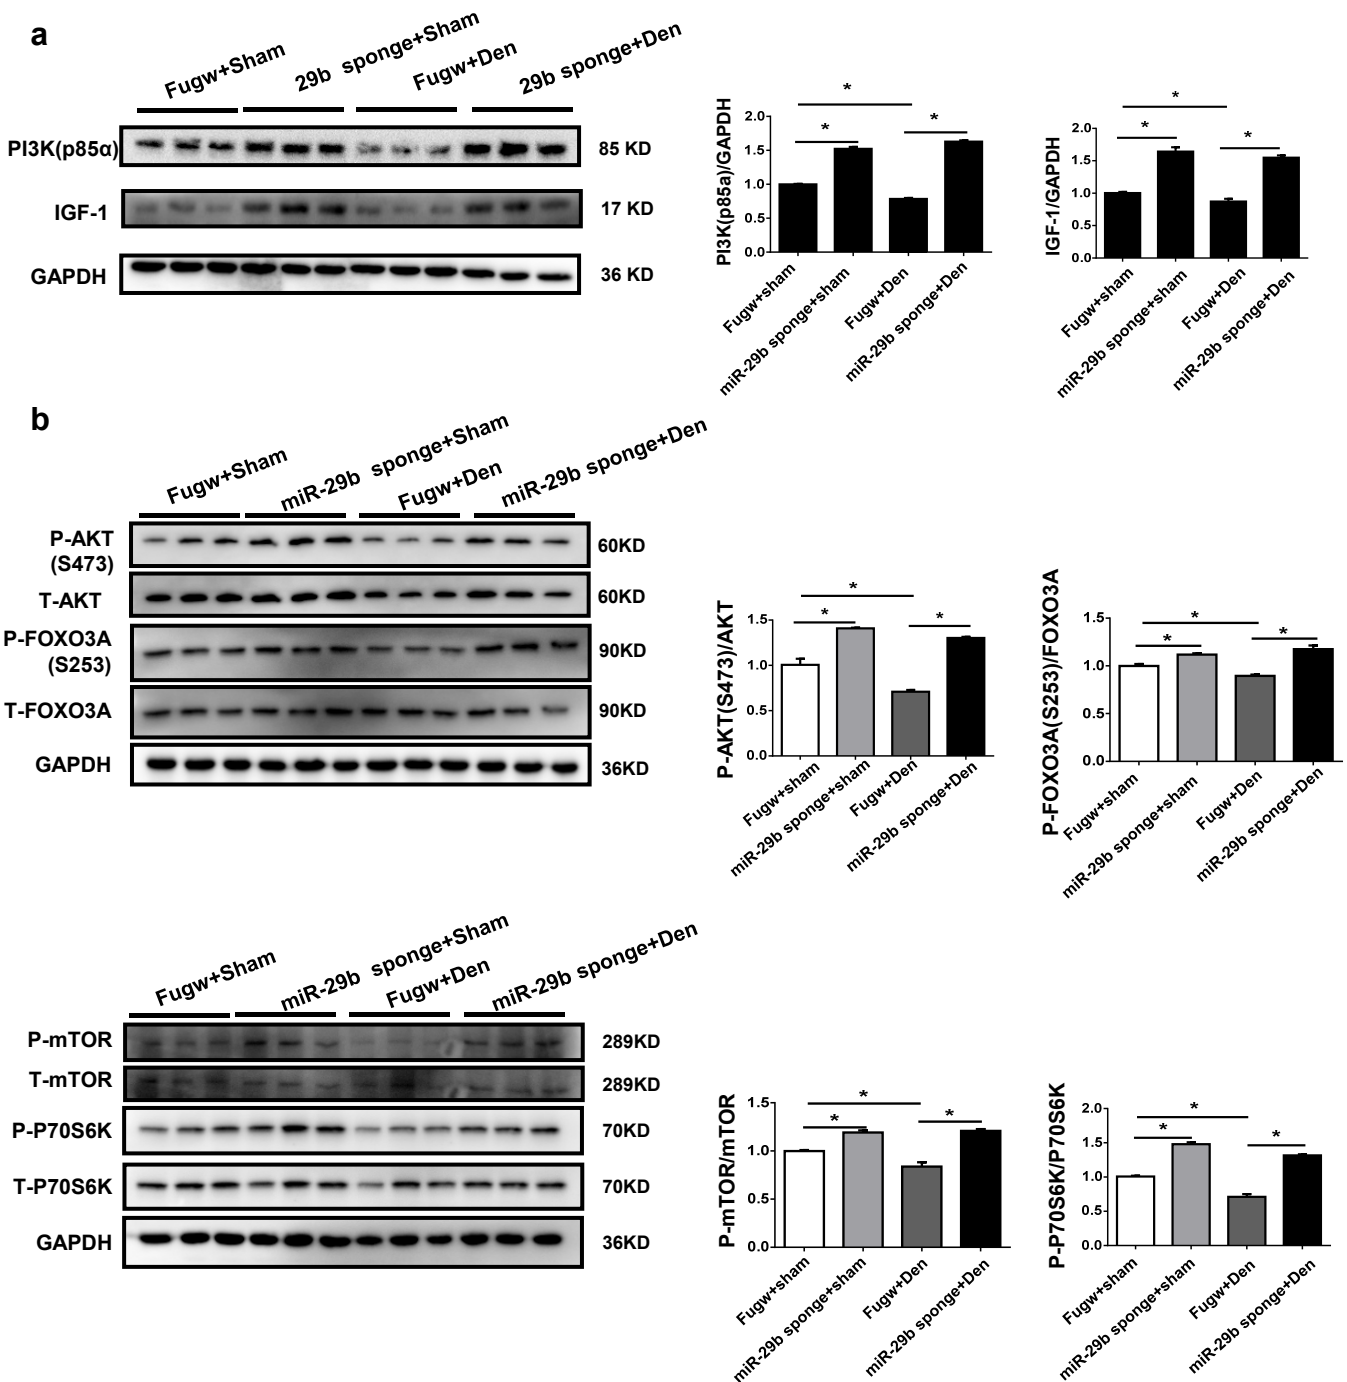

### Supplementary Figure 8. miR-29b is necessary for muscle atrophy *in vivo*

(a) Western blot analysis showed that IGF-1 and PI3K(p85 $\alpha$ ) were up-regulated in the gastrocnemius from mice treated with miR-29b sponge compared to Fugw control in the presence or absence of denervation (Den) (n=3 per group). (b) Western blot analysis showed increased phosphorylation levels of AKT, FOXO3A, mTOR, and P70S6K in the gastrocnemius from mice treated with miR-29b sponge compared to Fugw control in the presence or absence of denervation (Den) (n=3 per group). Error bars, SEM. One-way ANOVA test was performed to compare multiple groups followed by Bonferroni's post hoc test. \*,  $P < 0.05$ .

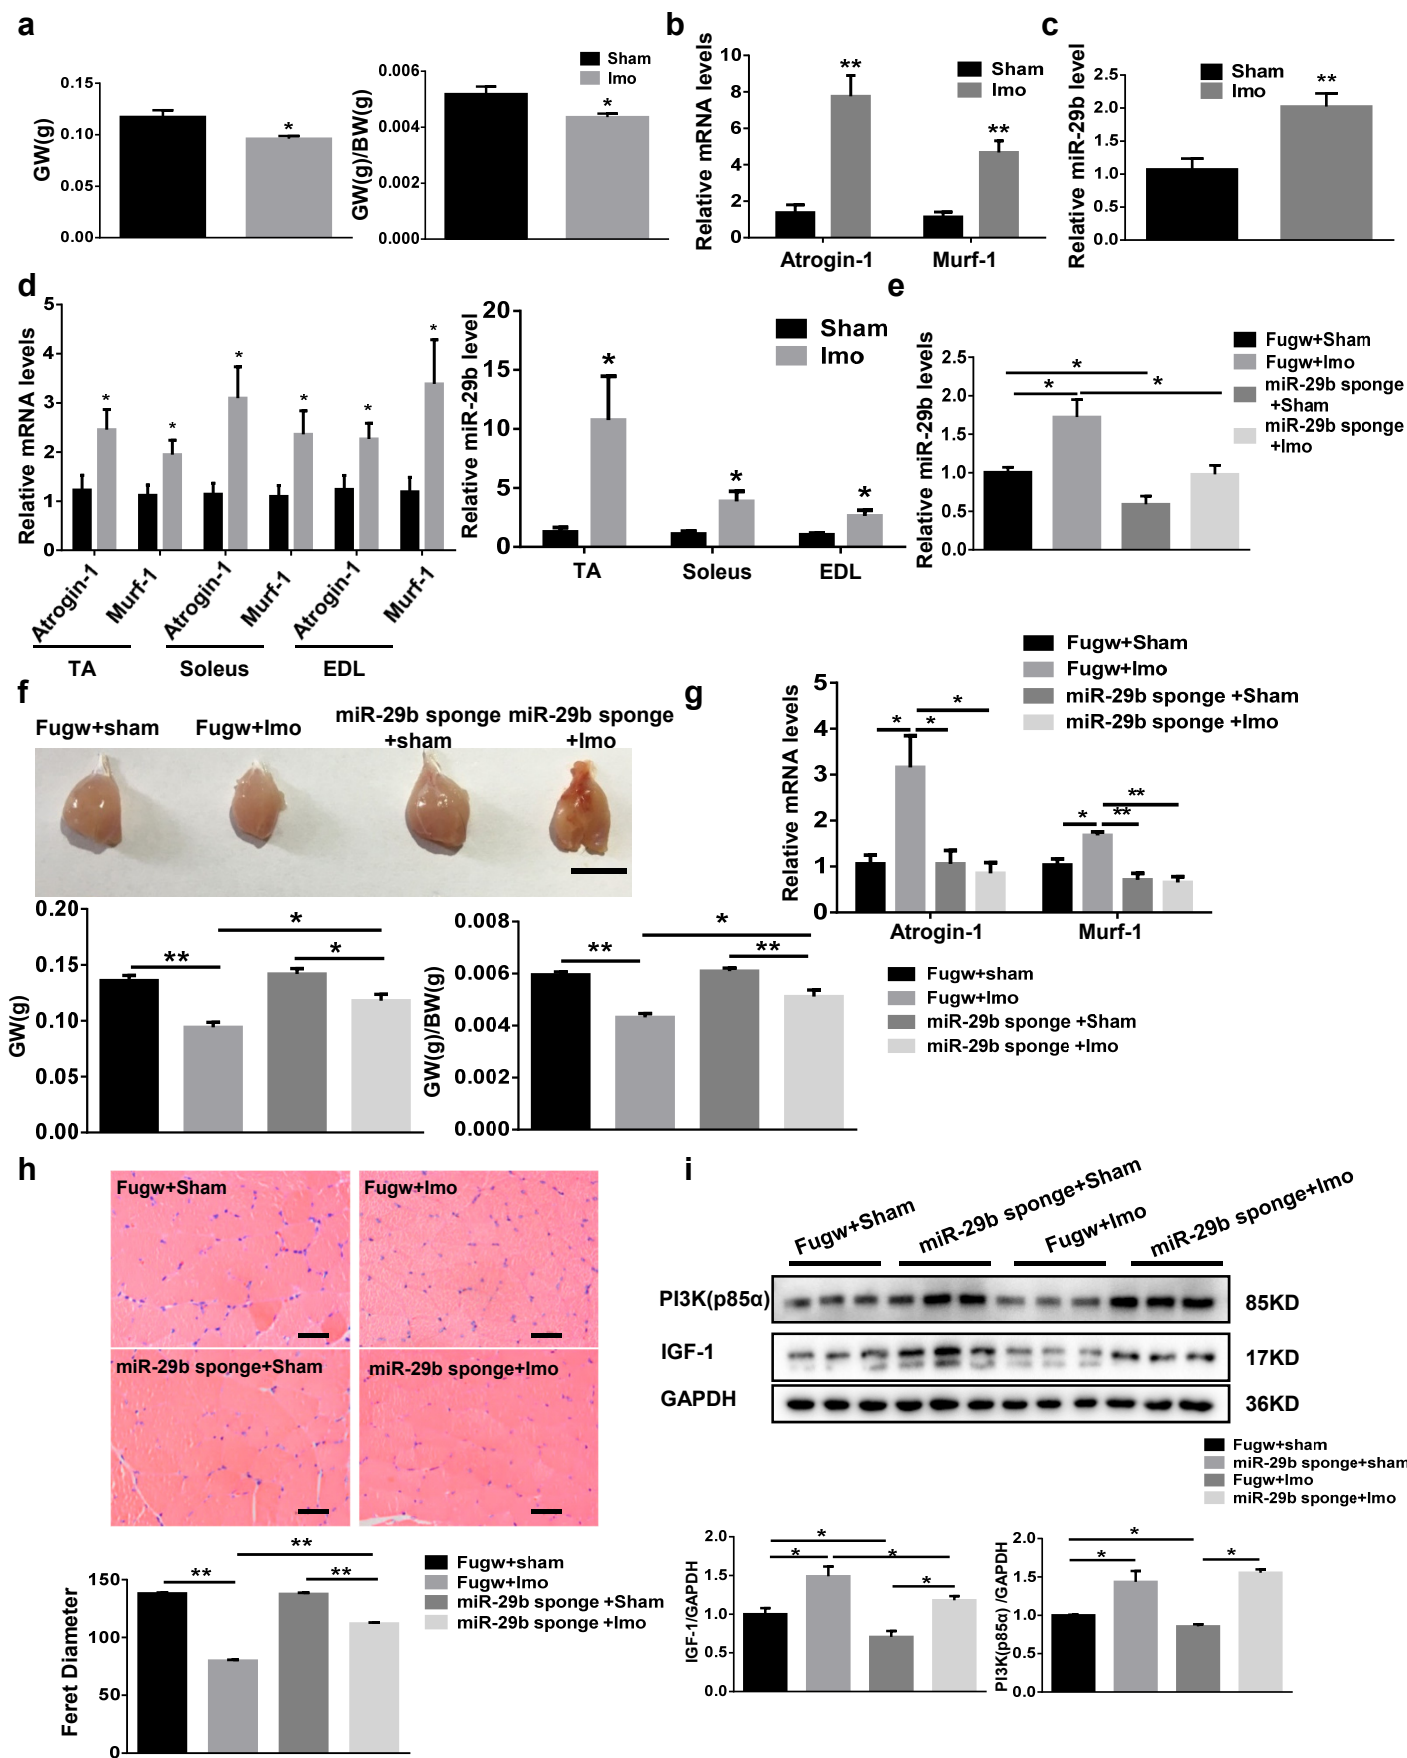

**Supplementary Figure 9. miR-29b in immobilization-induced muscle atrophy**

**(a)** Gastrocnemius muscle weight (GW) and Gastrocnemius muscle weight/Body weight (GW/BW) ratio

were reduced in immobilization mice compared to control group (n=6 per group). **(b)** qRT-PCR showed that *Atrogin-1* and *Murf-1* were up-regulated in the gastrocnemius from immobilization mice (n=6 per group). **(c)** qRT-PCR showed that miR-29b was up-regulated in the gastrocnemius from immobilization mice (n=6 per group). **(d)** qRT-PCR analysis showed increased *Atrogin-1*, *Murf-1*, and miR-29b expressions in the tibialis anterior (TA), soleus, and extensor digitorum longus (EDL) from immobilization mice compared to controls (n=6 per group). **(e)** qRT-PCR showed that miR-29b sponge significantly decreased miR-29b expression in the gastrocnemius (n=5 per group). **(f)** Gastrocnemius muscle morphology, GW, and GW/BW ratio showed that miR-29b sponge at least partly blocked immobilization-induced muscle atrophy (n=5 per group, scale bar: 1 cm). **(g)** qRT-PCR analysis showed that *Atrogin-1* and *Murf-1* were no longer up-regulated in immobilization mice treated with miR-29b sponge (n=5 per group). **(h)** Hematoxylin-eosin (HE) staining showed that the reduction in muscle fiber diameter in immobilization mice was partly attenuated by miR-29b sponge (n=5 per group, scale bar: 50  $\mu$ m). **(i)** Western blot analysis showed that the down-regulation of IGF-1 and PI3K(p85 $\alpha$ ) expression levels in immobilization mice were blocked by miR-29b sponge (n=3 per group). Age and sex matched mice were used for experiments randomly. Error bars, SEM. An unpaired, two-tailed Student's t test was used for comparisons between two groups **(a-d)**. One-way ANOVA test was performed to compare multiple groups followed by Bonferroni's post hoc test **(e-i)**. \*,  $P < 0.05$ . \*\*,  $P < 0.01$ .

Supplementary Figure 10. Uncropped scans of Western blots

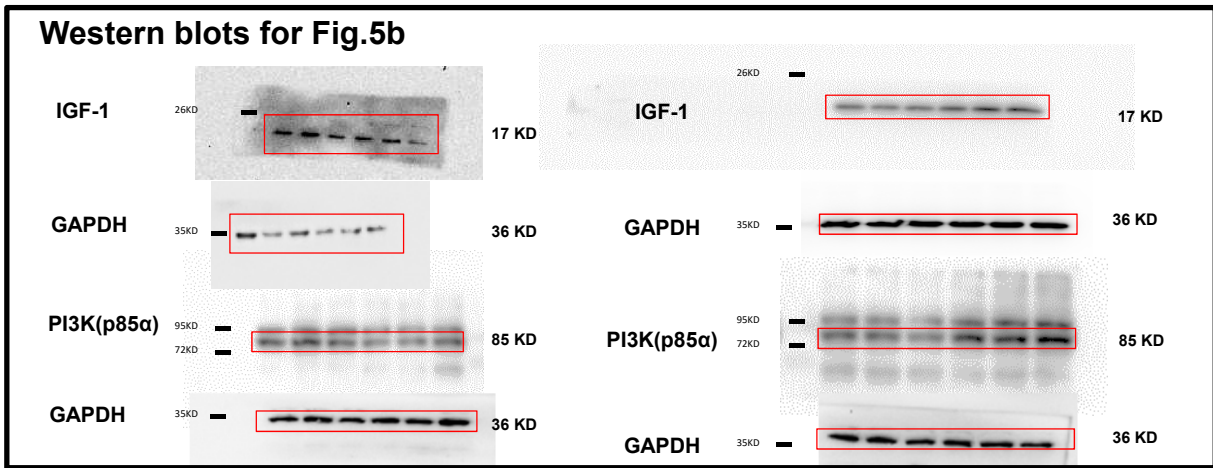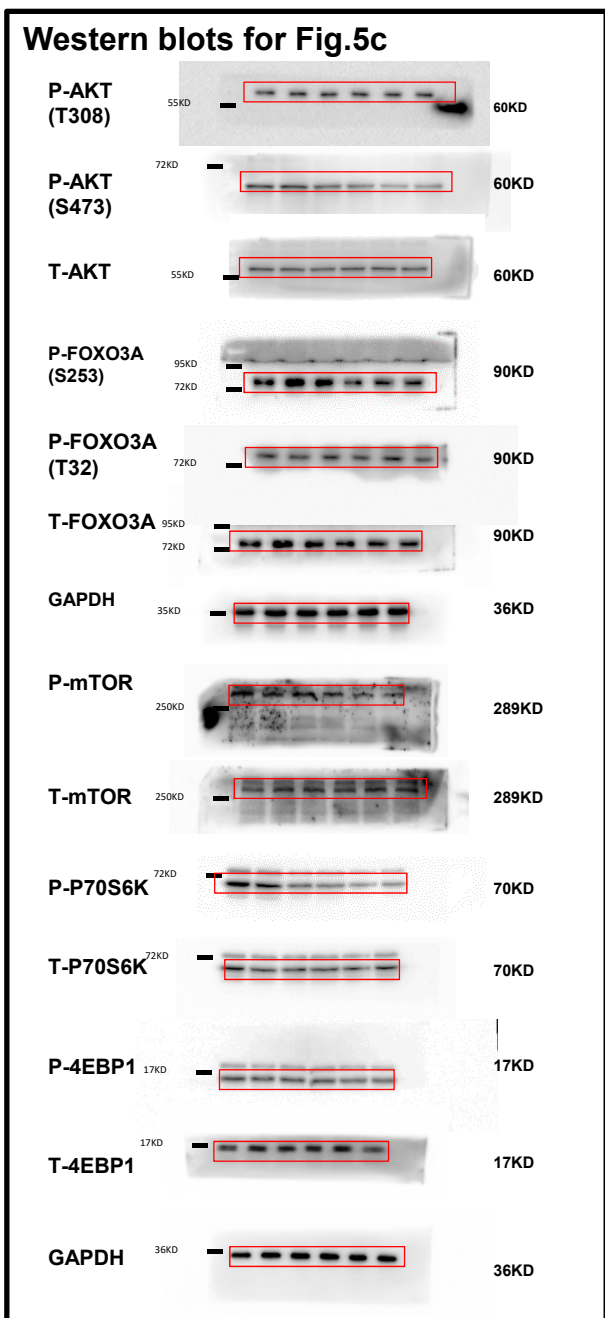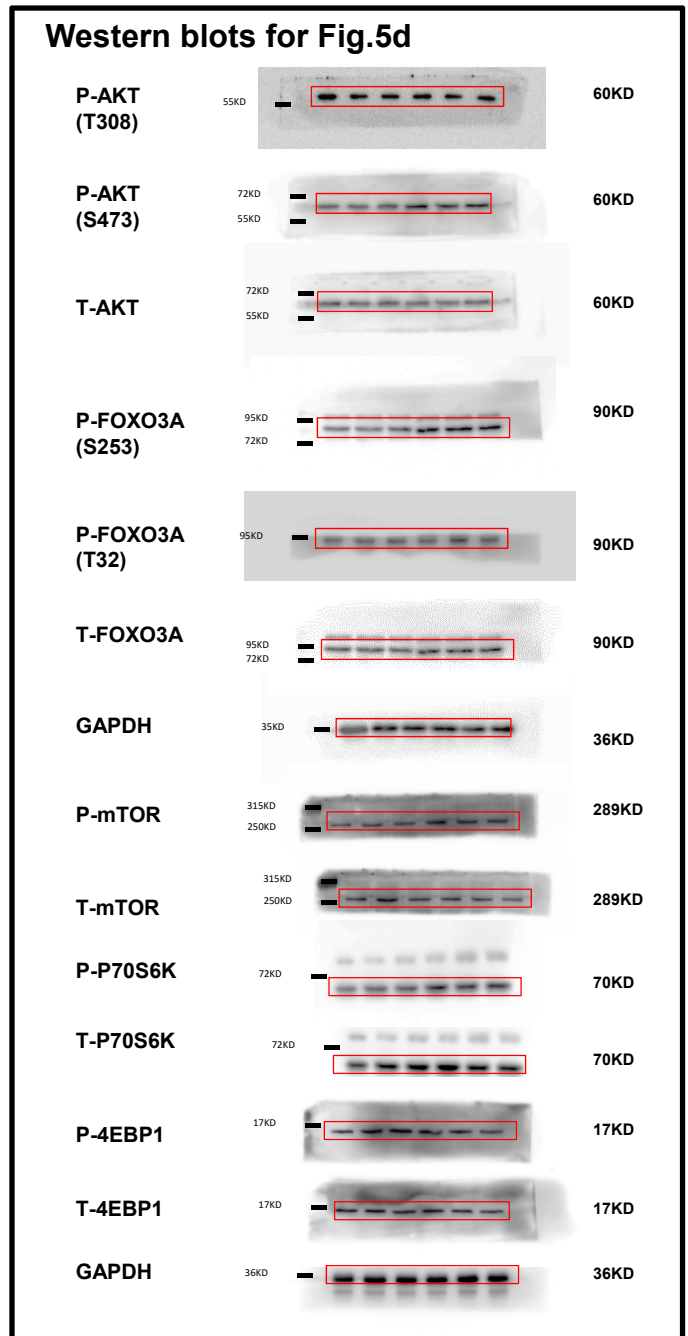

### Western blots for Fig.7d

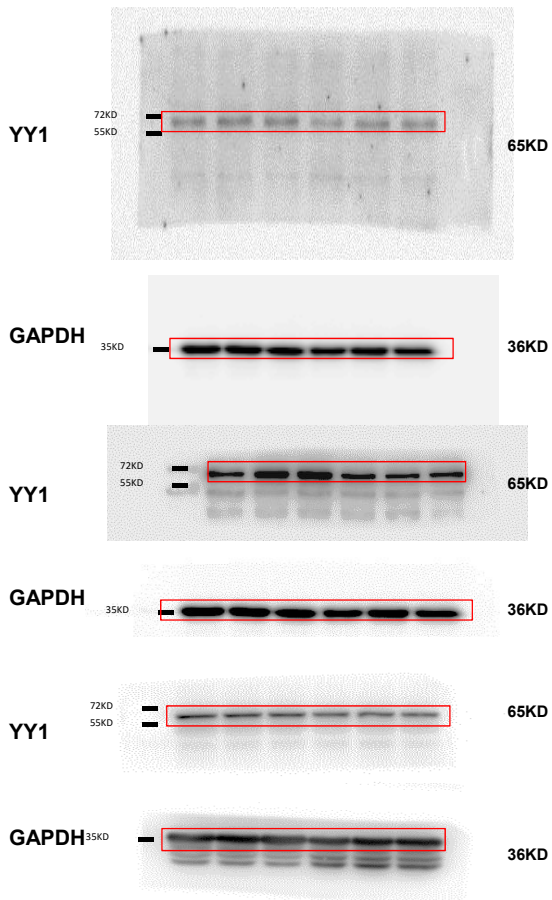

### Western blots for Fig.8i

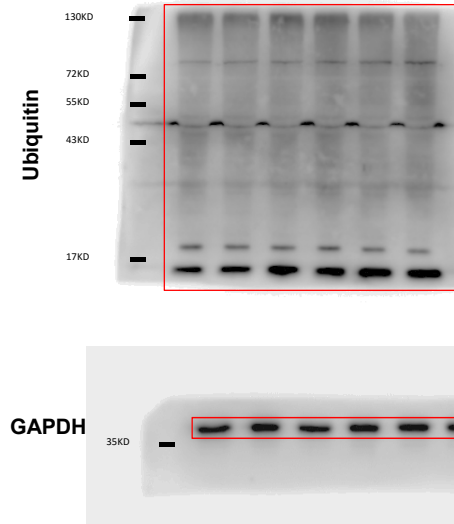

### Western blots for Fig.8k

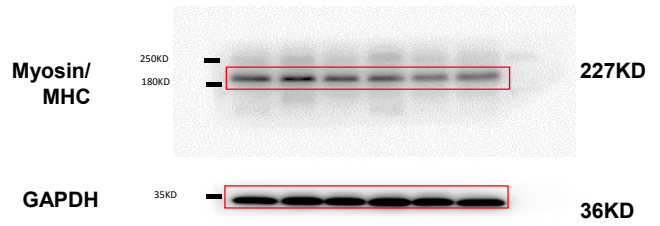

### Western blots for Fig.8l

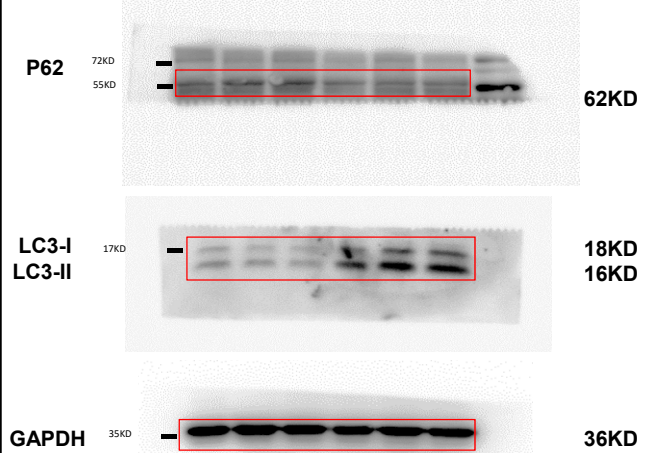

### Western blots for Sup Fig.5a

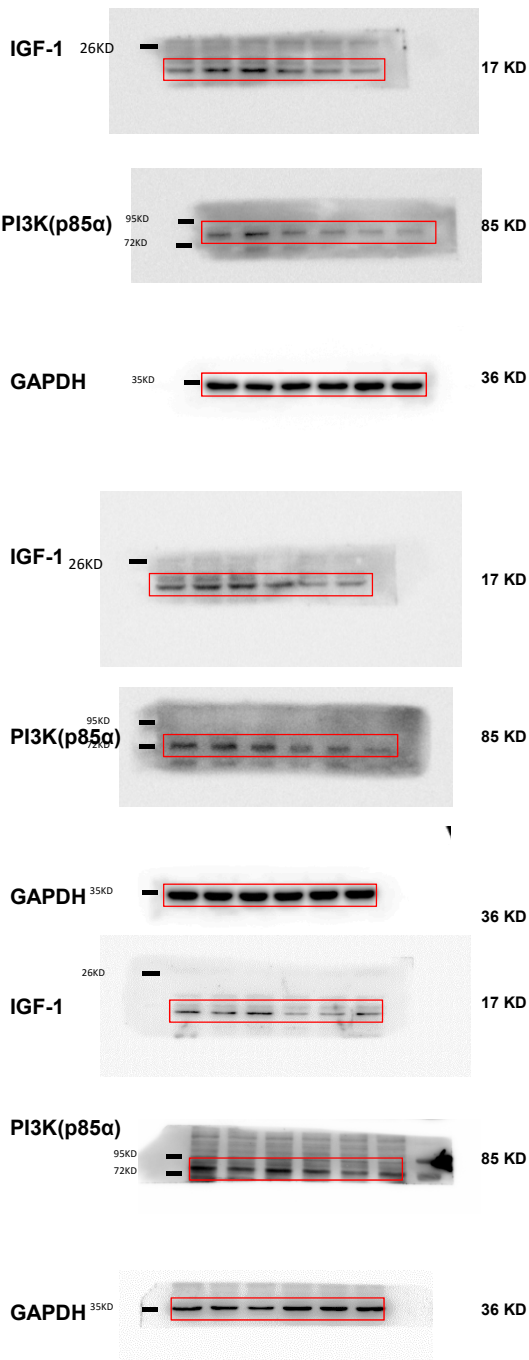

### Western blots for Sup Fig.5b

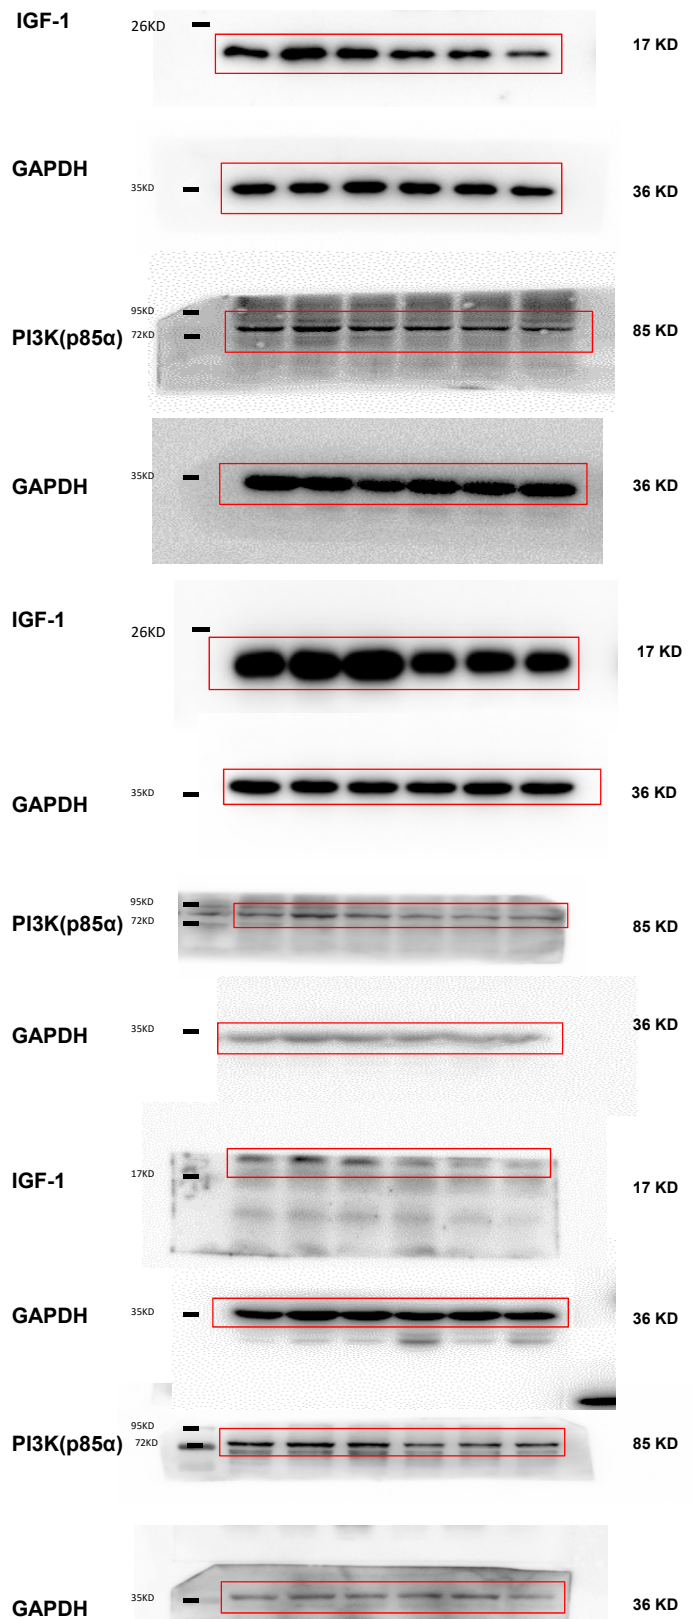

### Western blots for Sup Fig.6a

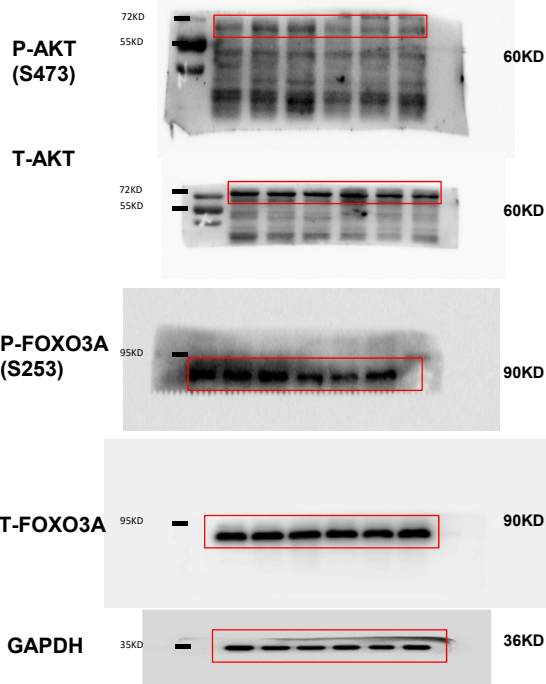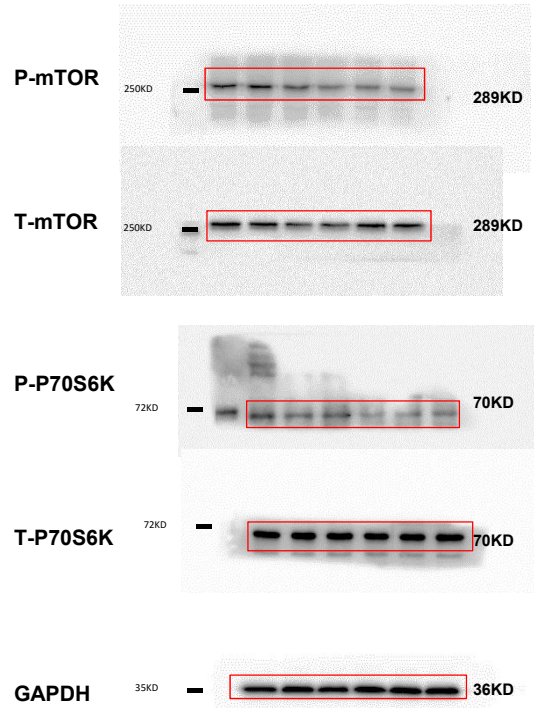

### Western blots for Sup Fig.6b

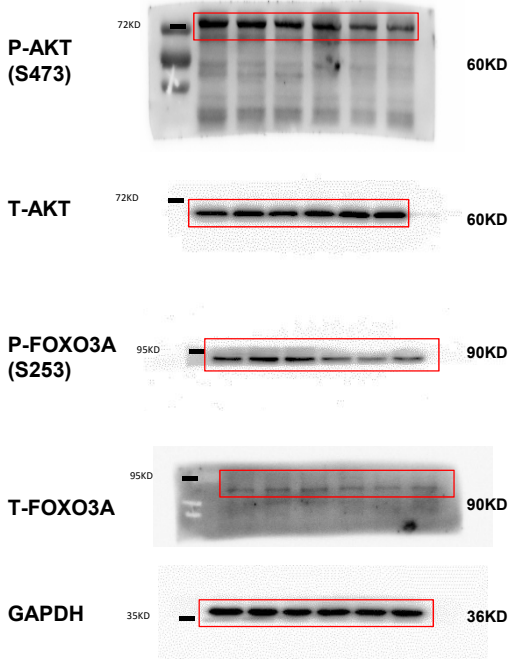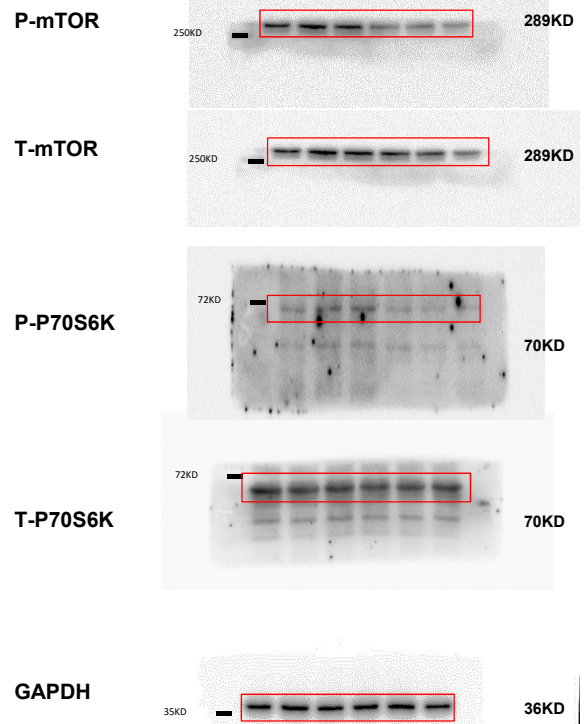

### Western blots for Sup Fig.6c

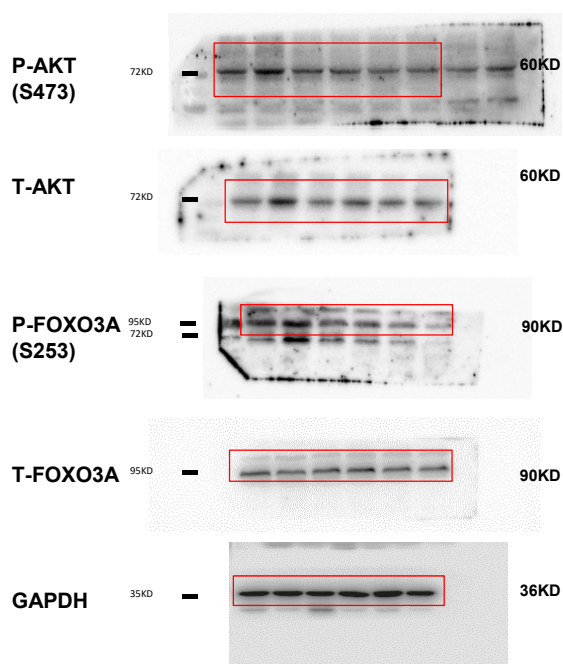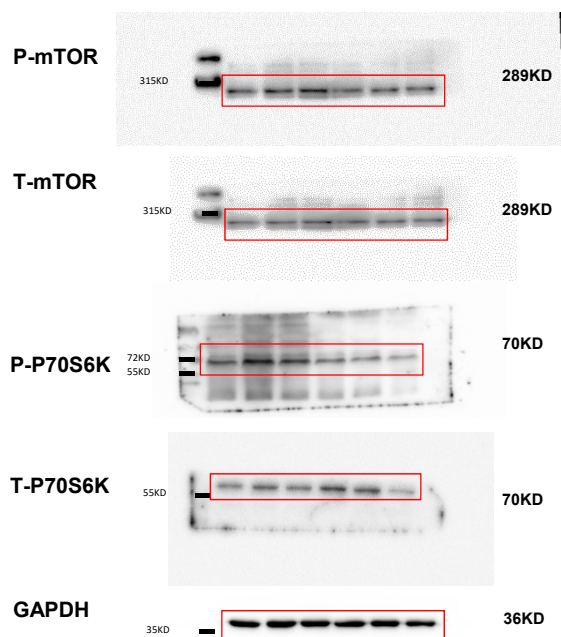

### Western blots for Sup Fig.7h

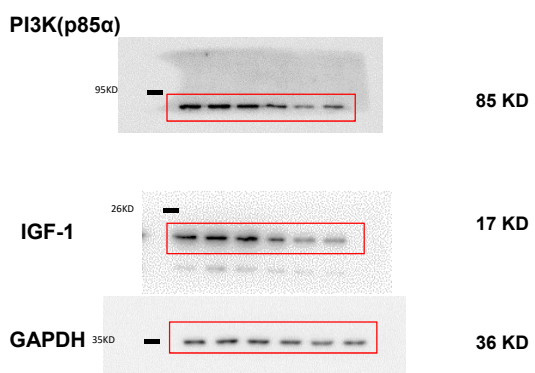



### Western blots for Sup Fig.7i

**P-AKT (S473)** 72KD 60KD

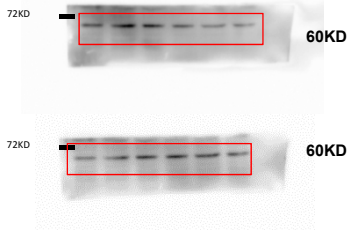

**T-AKT** 72KD 60KD

**P-FOXO3A (S253)** 95KD 72KD 90KD

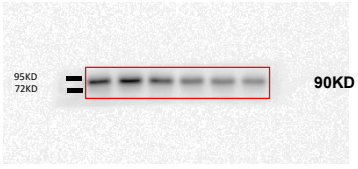

**T-FOXO3A** 95KD 90KD

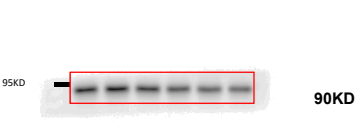

**GAPDH** 35KD 36KD

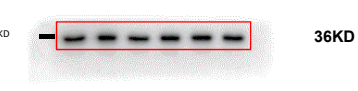

**P-mTOR** 315KD 289KD

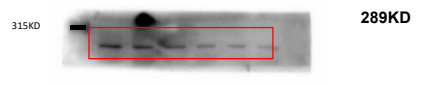

**T-mTOR** 315KD 289KD

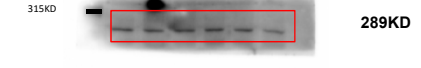

**P-P70S6K** 72KD 70KD

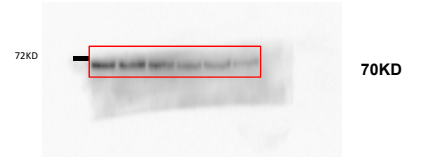

**T-P70S6K** 72KD 70KD

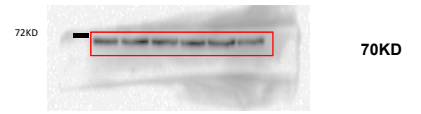

**GAPDH** 35KD 36KD

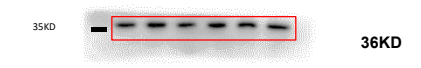

### Western blots for Sup Fig.8a

**PI3K(p85α)** 72KD 85 KD

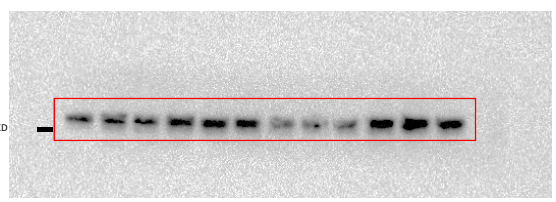

**IGF-1** 17KD 17 KD

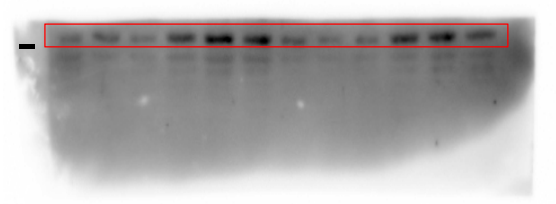

**GAPDH** 35KD 36 KD

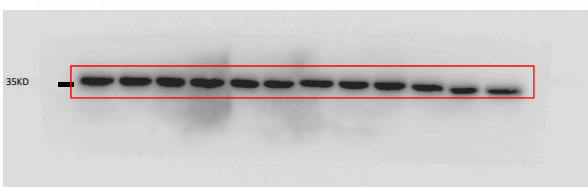

### Western blots for Sup Fig.8b

**P-AKT  
(S473)**

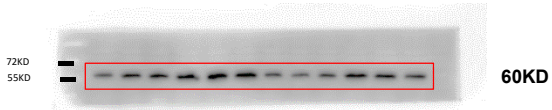

**T-AKT**

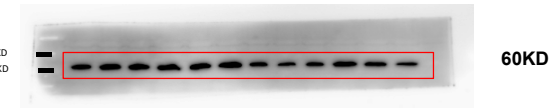

**P-FOXO3A  
(S253)**

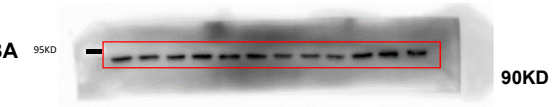

**T-FOXO3A**

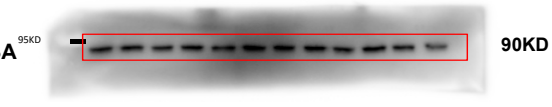

**GAPDH**

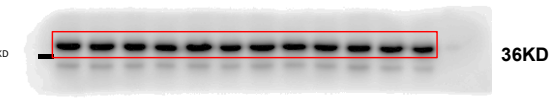

**P-mTOR**

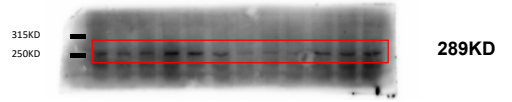

**T-mTOR**

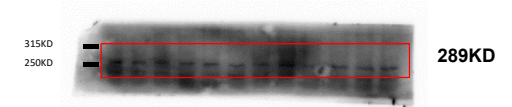

**P-P70S6K**

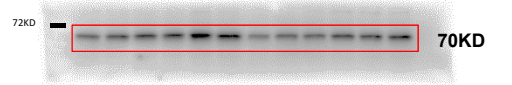

**T-P70S6K**

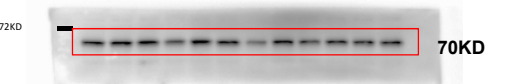

**GAPDH**

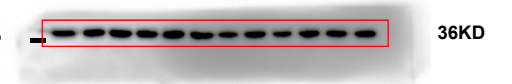

### Western blots for Sup Fig.9i

**PI3K(p85 $\alpha$ )**

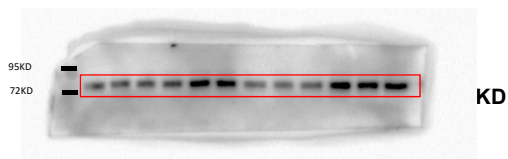

**IGF-1**

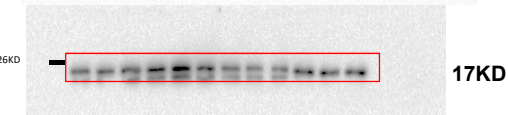

**GAPDH**

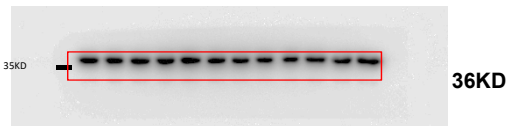

**Supplementary Table 1. Aberrant expressed microRNAs in denervated muscle**

| <b>MicroRNA</b> | <b>Regulation</b> | <b>Fold change</b> | <b>P value</b> |
|-----------------|-------------------|--------------------|----------------|
| miR-130b        | up                | 6.82               | 0.0016         |
| miR-21          | up                | 6.35               | 0.0020         |
| miR-29b         | up                | 3.87               | 0.0039         |
| miR-212         | up                | 3.38               | 0.0143         |
| miR-672         | up                | 3.24               | 0.0344         |
| miR-223         | up                | 3.08               | 0.0081         |
| miR-222         | up                | 3.03               | 0.0001         |
| miR-221         | up                | 3.01               | 0.0002         |
| miR-203         | up                | 2.98               | 0.0135         |
| miR-132         | up                | 2.92               | 0.0060         |
| miR-511*        | up                | 2.77               | 0.0032         |
| miR-146b        | up                | 2.68               | 0.0021         |
| miR-133a*       | down              | 2.39               | 0.0086         |
| miR-1949        | up                | 2.38               | 0.0404         |
| miR-326         | up                | 2.21               | 0.0231         |

**Supplementary Table 2. siRNA sequences used in this study**

| <b>Gene</b>      | <b>Sequence (5'-3')</b> |
|------------------|-------------------------|
| <i>mmu-Yy1</i>   | GCCCTCATAAAGGCTGCAC     |
|                  | CCCTAAGCAACTGGCAGAA     |
| <i>mmu-IGF-1</i> | GCCTTCCA ACTCAATTATT    |
|                  | GCCTCTGTGACTTCTTGAA     |

**Supplementary Table 3. Primer sequences for qRT-PCRs used in this study**

| <b>Gene</b>                        | <b>Forward primer(5'-3')</b> | <b>Reverse primer(5'-3')</b> |
|------------------------------------|------------------------------|------------------------------|
| <i>rno-Atrogin-1</i>               | TTCCATCAGGAGAAGTGGATCT       | GGCAGTCGAGAAGTCCAGTC         |
| <i>rno-Murf-1</i>                  | CACGAAGACGAGAAAATCAACA       | TGTCCTTGGAAGATGCTTTGTA       |
| <i>rno-18S</i>                     | TCAAGAACGAAAGTCGGAGG         | GGACATCTAAGGGCATCAC          |
| <i>mmu-MHC</i>                     | GAGGGTGGCTCTCACACATTC        | TTGGCCTTCGTAAGCAAACCTG       |
| <i>mmu-Myod</i>                    | CCACTCCGGGACATAGACTTG        | AAAAGCGCAGGTCTGGTGAG         |
| <i>mmu-myog</i>                    | GAGACATCCCCCTATTTCTACCA      | GCTCAGTCCGCTCATAGCC          |
| <i>mmu-Myf5</i>                    | AAGGCTCCTGTATCCCCTCAC        | TGACCTTCTTCAGGCGTCTAC        |
| <i>mmu-IL-1<math>\alpha</math></i> | CGAAGACTACAGTTCTGCCATT       | GACGTTTCAGAGGTTCTCAGAG       |
| <i>mmu-IL-1<math>\beta</math></i>  | GCAACTGTTCTGAACTCAACT        | ATCTTTTGGGGTCCGTCAACT        |
| <i>mmu-IL-6</i>                    | TAGTCCTTCTACCCCAATTTCC       | TTGGTCCTTAGCCACTCCTTC        |
| <i>mmu-Yy1</i>                     | CAGTGGTTGAAGAGCAGATCAT       | AGGGAGTTTCTTGCCTGTCAT        |
| <i>mmu-Traf6</i>                   | AAAGCGAGAGATTCTTTCCCTG       | ACTGGGGACAATTCAGTAGAGC       |

|                       |                          |                          |
|-----------------------|--------------------------|--------------------------|
| <i>mmu-Nedd4</i>      | TCGGAGGACGAGGTATGGG      | GGTACGGATCAGCAGTGAACA    |
| <i>mmu-Mull</i>       | CTGGGCACCAGTTCGATGG      | GACAGCATAAGGCACACACTT    |
| <i>mmu-Znf216</i>     | CCCATGCTGTGTAGTACAGGA    | GCTCATTCTGCCACTATTCTGC   |
| <i>mmu-Fbxo40</i>     | CGTCTCCTGCCTGGTGATAAG    | GTATGCTCTGACTCTTTGCACAT  |
| <i>mmu-Murf2</i>      | AAAGCAACTGATCTGTCCCATC   | TGTGGGTAAGTACGGGTTAGAG   |
| <i>mmu-Murf3</i>      | GGAGAAGCAGCTCATTG GCC    | CCTCCTGAAGACACCGTTGTG    |
| <i>mmu-Cblb</i>       | GGTCGCATTTTGGGGATTATTGA  | TTTGGCACAGTCTTACCACTTT   |
| <i>mmu-Atg7</i>       | GTTCGCCCCCTTTAATAGTGC    | TGAACTCCAACGTCAAGCGG     |
| <i>mmu-Map1-1c3</i>   | CACTGCTCTGTCTTGTGTAGGTTG | TCGTTGTGCCTTTATTAGTGCATC |
| <i>mmu-Cathepsinl</i> | GTGGACTGTTCTCACGCTCAAG   | TCCGTCCTTCGCTTCATAGG     |
| <i>mmu-Gabarapl1</i>  | CATCGTGGAGAAGGCTCCTA     | ATACAGCTGGCCCATGGTAG     |
| <i>mmu-Bnip3</i>      | TTCCACTAGCACCTTCTGATGA   | GAACACCGCATTTACAGAACAA   |
| <i>mmu-Bnip3l</i>     | TTGGGGCATT TTAACCTTG     | TGCAGGTGACTGGTGGTACTAA   |
| <i>mmu-Atg12</i>      | TCCGTGCCATCACATACACA     | TAAGACTGCTGTGGGGCTGA     |

|                   |                         |                        |
|-------------------|-------------------------|------------------------|
| <i>mmu-Vps34</i>  | TGTCAGATGAGGAGGCTGTG    | CCAGGCACGACGTAACTTCT   |
| <i>mmu-Beclin</i> | TGAATGAGGATGACAGTGAGCA  | CACCTGGTTCTCCACACTCTTG |
| <i>mmu-Atg4b</i>  | ATTGCTGTGGGGTTTTTCTG    | AACCCCAGGATTTTCAGAGG   |
| <i>mmu-TBP</i>    | TGTGAATACTGGTGCTGAG     | GGCATGAGACAAGACCTATA   |
| <i>mmu-Musk</i>   | TTCAGCGGGACTGAGAACT     | TGTCTTCCACGCTCAGAATG   |
| <i>mmu-Achra</i>  | TCCCTTCGATGAGCAGAACT    | GGGCAGCAGGAGTAGAACAC   |
| <i>mmu-Achre</i>  | GTGTCTGGATTGGCATTGACT   | ACACCTGCAAAATCGTCCTTG  |
| <i>mmu-Achrg</i>  | GACCAACCTCATCTCCCTGA    | GAGAGCCACCTCGAAGACAC   |
| <i>mmu-Cpla2</i>  | GACAGCTCCGACAGTGATGA    | CGTCCTTCTCGGGTATTGAA   |
| <i>mmu-Ncam</i>   | AAGGGGAAGGCACTGAATTT    | TCTCCTGCCACTTGACACAG   |
| <i>mmu-Runx1</i>  | AGCCTGGCAGTGTCAGAAGT    | TGGCATCTCTCATGAAGCAC   |
| <i>mmu-Myh1</i>   | GCGAATCGAGGCTCAGAACAA   | GTAGTTCCGCCTTCGGTCTTG  |
| <i>mmu-Myh2</i>   | AAGTGACTGTGAAAACAGAAGCA | GCAGCCATTTGTAAGGGTTGAC |
| <i>mmu-Myh4</i>   | CTTTGCTTACGTCAGTCAAGGT  | AGCGCCTGTGAGCTTGTAAG   |

|                      |                        |                         |
|----------------------|------------------------|-------------------------|
| <i>mmu-Myh7</i>      | ACTGTCAACACTAAGAGGGTCA | TTGGATGATTTGATCTTCCAGGG |
| <i>muu-Atrogin-1</i> | CAGCTTCGTGAGCGACCTC    | GGCAGTCGAGAAGTCCAGTC    |
| <i>Mmu-IGF-1</i>     | GTGGGGGCTCGTGTTTCTC    | GATCACCGTGCAGTTTTCCA    |
| <i>mmu-Murf-1</i>    | GTGTGAGGTGCCTACTTGCTC  | GCTCAGTCTTCTGTCCTTGGA   |
| <i>mmu-18S</i>       | TCAAGAACGAAAGTCGGAGG   | GGACATCTAAGGGCATCAC     |

---
